# Supplementary material
Source: PubMed Central journal article supplement (PMC9444798)
Supplement: NIHMS1832694-supplement-Supplemental_Material.pdf [file NIHMS1832694-supplement-Supplemental_Material.pdf]

# Supplementary Figure 1

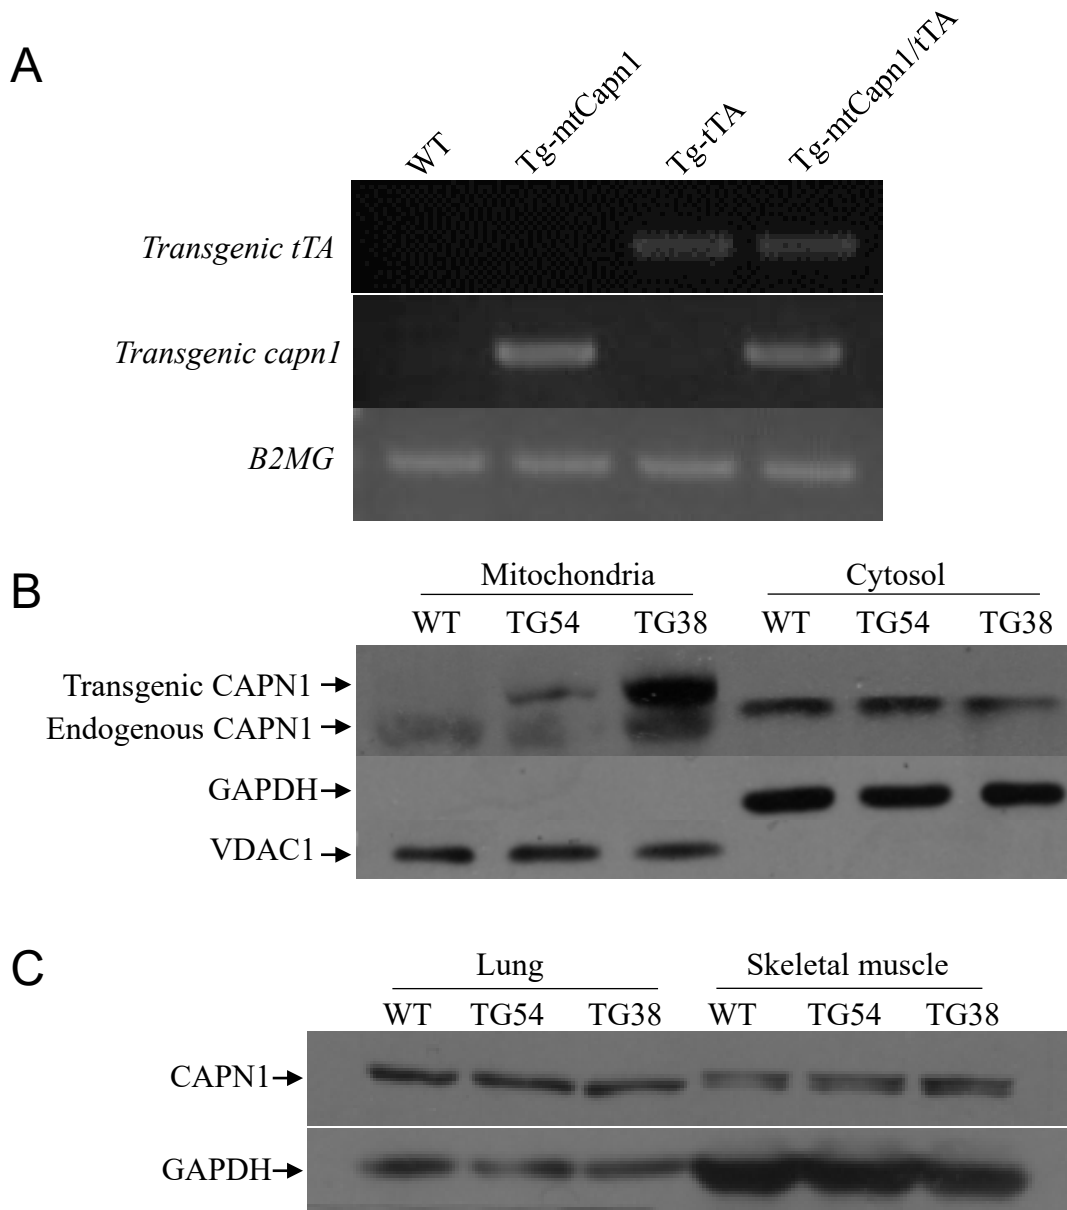

# Supplementary Figure 2

**A**

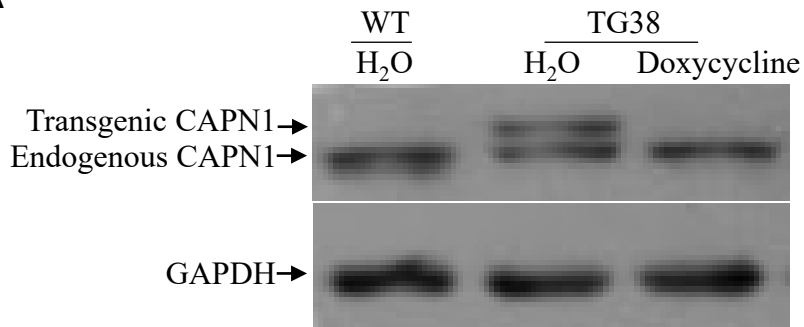

**B**

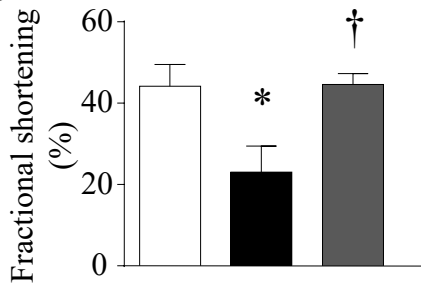

**C**

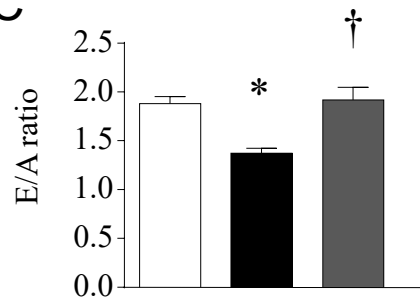

**D**

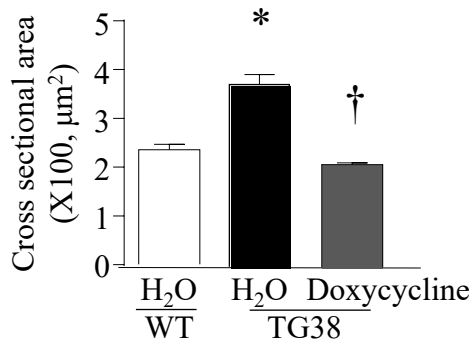

**E**

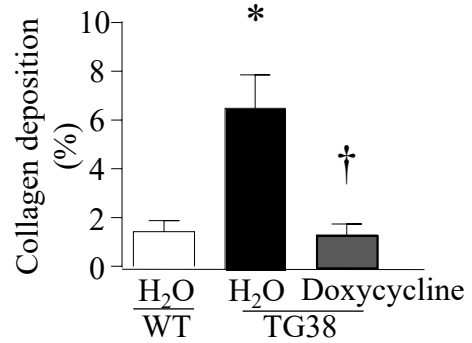

# Supplementary Figure 3

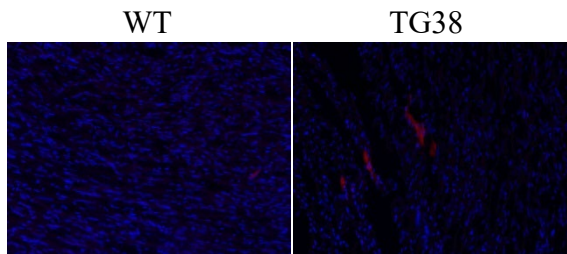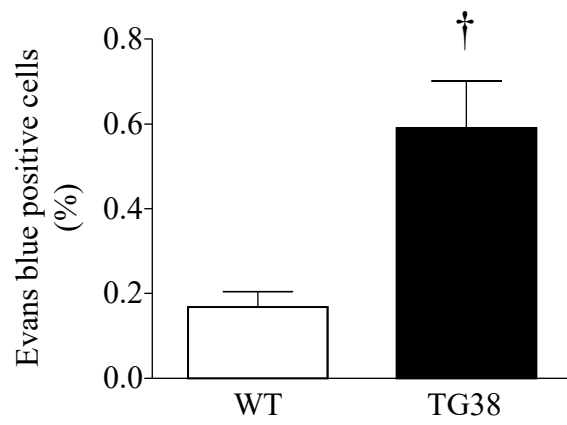

**Supplementary Table-1. Echocardiographic analysis, body weight and heart weight in mice**

|                        | Treatment | WT         |            |            | TG54       |            |            | TG38       |            |            |
|------------------------|-----------|------------|------------|------------|------------|------------|------------|------------|------------|------------|
|                        |           | Vehicle    | TEMPO      | Mito-TEMPO | Vehicle    | TEMPO      | Mito-TEMPO | Vehicle    | TEMPO      | Mito-TEMPO |
| N                      | Before    | 5          | 5          | 5          | 5          | 4          | 5          | 5          | 4          | 6          |
|                        | After     | 5          | 5          | 5          | 5          | 4          | 5          | 5          | 4          | 5          |
| LVEDD (cm)             | Before    | 3.4±0.3    | 3.4±0.3    | 3.6±0.2    | 3.8±0.2    | 3.4±0.3    | 3.3±0.4    | 3.6±0.3    | 3.7±0.1    | 3.8±0.4    |
|                        | After     | 3.9±0.3    | 3.8±0.5    | 3.9±0.4    | 4.2±0.3    | 4.0±0.2    | 3.8±0.2    | 4.7±0.6*   | 4.4±0.3*   | 3.7±0.5    |
| LVESD (cm)             | Before    | 1.9±0.1    | 1.8±0.3    | 2.0±0.1    | 2.4±0.3    | 2.2±0.2    | 2.2±0.3    | 2.7±0.3    | 2.7±0.3    | 3.0±0.5    |
|                        | After     | 2.2±0.2    | 2.2±0.6    | 2.2±0.3    | 3.0±0.2*#  | 2.9±0.1*\$ | 2.1±0.4 †  | 3.9±0.6*#  | 3.5±0.5*\$ | 2.5±0.5 ‡  |
| Heart rate (beats/min) | Before    | 404±13     | 428±21     | 432±48     | 452±29     | 413±19     | 452±29     | 402±13     | 440±8      | 409±13     |
|                        | After     | 452±46     | 456±39     | 435±51     | 410±13     | 433±14     | 437±40     | 433±17     | 430±21     | 433±37     |
| SV (μl/beat)           | Before    | 34.2±0.2   | 35.8±0.9   | 35.5±0.9   | 34.5±5.5   | 32.9±6     | 32.1±3.2   | 35.5±6.9   | 33.2±3.9   | 33.5±1.5   |
|                        | After     | 47.9±11.3  | 47.2±10.4  | 52.5±12.8  | 41.8±8.5#  | 36.1±4.5\$ | 43.0±9     | 28.2±3.5#  | 30.9±8.8\$ | 40.5±2.9‡  |
| CO (ml/min)            | Before    | 13.7±0.4   | 15.2±1.4   | 15.3±1.1   | 15.6±2.9   | 13.2±2.2   | 14.1±1.3   | 14.4±2.8   | 14.0±2.0   | 14.7±0.5   |
|                        | After     | 21.0±2.9   | 21.3±4.2   | 22.4±4.4   | 17.0±3.3#  | 15.5±1.5\$ | 19.0±4.7 † | 12.2±1.5#  | 13.3±3.8\$ | 17.2±2.7‡  |
| Body weight (g)        | Before    | 23.0±0.8   | 22.2±1.5   | 22.3±1.0   | 26.5±0.4   | 22.9±1.6   | 23.7±1.5   | 24.6±0.5   | 23.2±1.2   | 23.5±0.7   |
|                        | After     | 27.7±2.4   | 25.8±2.2   | 24.5±1.1   | 27.0±2.0   | 24.4±0.8   | 27.9±2.3   | 24.3±2.6   | 24.7±1.8   | 26.3±2.2   |
| Heart weight (mg)      | After     | 119.8±12.4 | 112.6±22.2 | 112.6±17.9 | 117.4±12.3 | 111±13.2   | 121.5±6.9  | 145.3±20.5 | 132.4±15.5 | 120.9±17.2 |

Transgenic mice Tg-mtCapn1/tTA<sup>low</sup> (TG54), Tg-mtCapn1/tTA<sup>high</sup> (TG38) and their wild-type littermates were given mito-TEMPO, TEMPO or vehicle starting from age two months for one month. N indicates numbers of animals in each group. LVEDD, LVESD, SV and CO indicate left ventricular end diastolic diameter and left ventricular and systolic diameter, stroke volume, and cardiac output, respectively. \**P*< 0.05 versus before treatment in the same category, # *P*< 0.05 versus WT+vehicle, \$ *P*< 0.05 versus WT+TEMPO, † *P*< 0.05 versus TG54+vehicle and TG54+TEMPO, and ‡ *P*< 0.05 versus TG38+vehicle and TG38+TEMPO.
